# Supplementary material for: Singlet and triplet states of the sandwich-type Be2B6 and Be2B7+ clusters. A test for the electron counting rules of aromaticity
Source: Royal Society of Chemistry journal article supplement (doi:10.1039/d0nj04643d), 2020-01-01
Supplement: d0nj04643d1.pdf [file d0nj04643d1.pdf]

## **Electronic Supplementary Information**

### **Singlet and triplet states of the sandwich-type $\text{Be}_2\text{B}_6$ and $\text{Be}_2\text{B}_7^+$ clusters. A test for electron counting rules of aromaticity**

Sladana Đorđević, Slavko Radenković\*

*University of Kragujevac, Faculty of Science, P. O. Box 60, 34000 Kragujevac, Serbia*

\*Corresponding author: [slavkoradenkovic@kg.ac.rs](mailto:slavkoradenkovic@kg.ac.rs)

## TABLE OF CONTENTS

Figure S1:  $\sigma$  and  $\pi$  occupied canonical molecular orbitals for **2T** and **2S**

Figure S2: Total current density maps for the examined molecules

Figure S3:  $\pi$  and  $\sigma$  frontier orbital energy levels for **2T** and **2S**

Figure S4: Maps of total,  $\pi$  and  $\sigma$  current densities of benzene

Table S1: Bond current strengths for the symmetry-unique bonds in **3T** and **3S**

Table S2: Cartesian coordinates and energy (in au) for studied molecules

Table S3: Cartesian coordinates and energy (in au) for low-lying isomeric structures of  $\text{Be}_2\text{B}_8^{2+}$  complex in singlet and triplet spin states

Table S4: complete ref.<sup>73</sup>

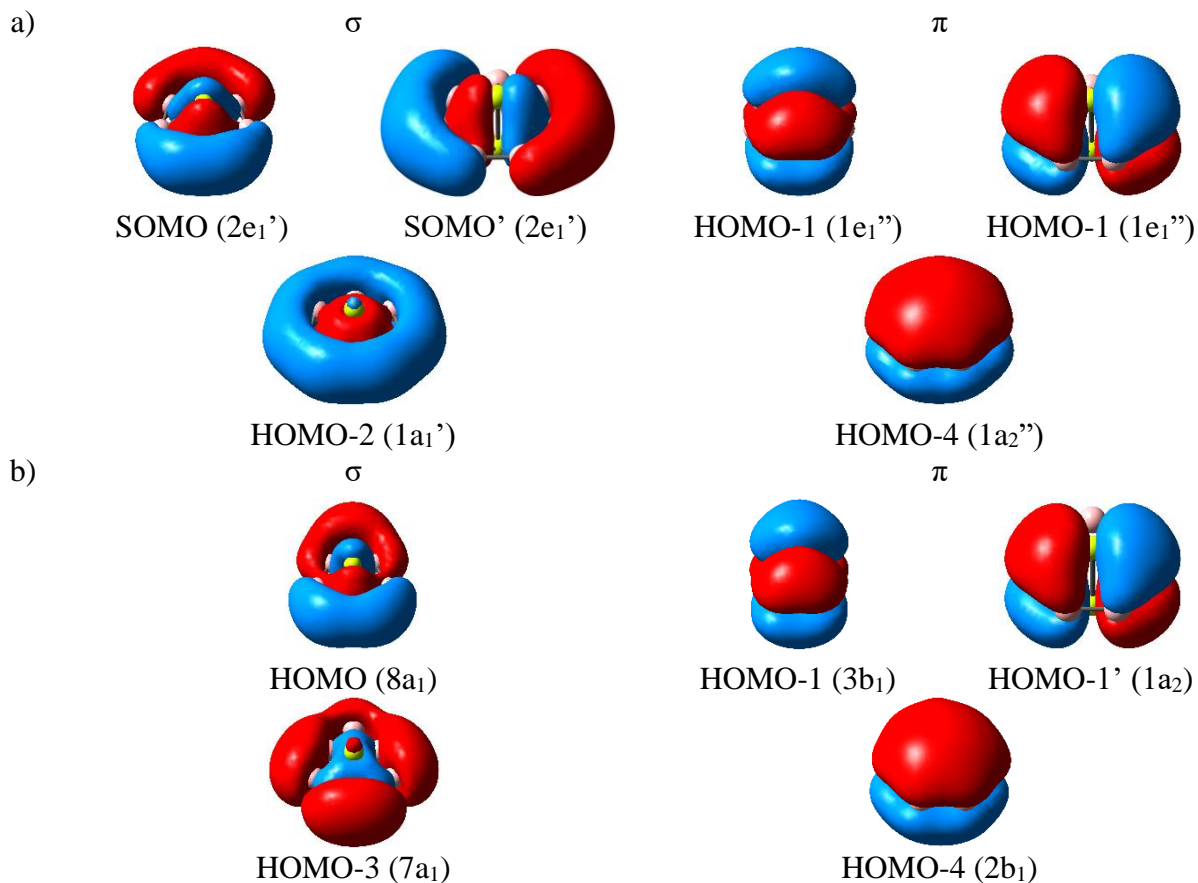

**Figure S1.** a)  $\sigma$  and  $\pi$  occupied canonical molecular spin orbitals for **2T** obtained at the UB3LYP/def2-TZVP level; b)  $\sigma$  and  $\pi$  occupied canonical molecular orbitals for **2S** obtained at the RB3LYP/def2-TZVP level of theory.

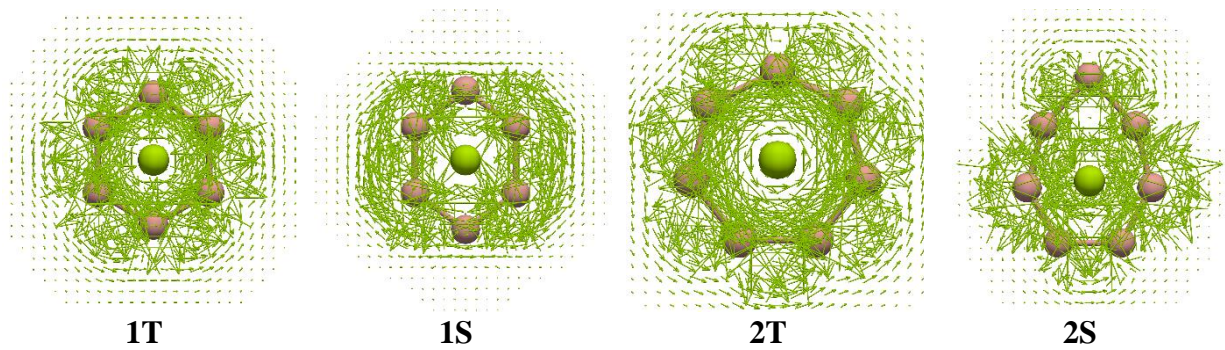

**Figure S2.** Total current density maps calculated 1 bohr above boron planes. Other details same as in Figure 3.

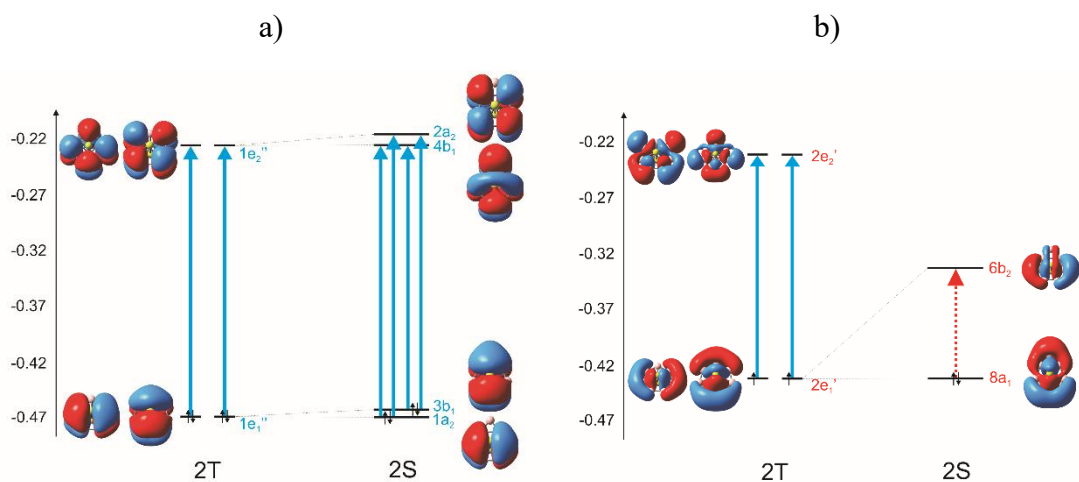

**Figure S3.**  $\pi$  (a) and  $\sigma$  (b) frontier orbital energy levels (in au) of  $2T$  and  $2S$  obtained at the B3LYP/def2-TZVP level of theory. Full (blue) arrows represent the main translational transitions and dashed (red) arrows represent the main rotational transitions.

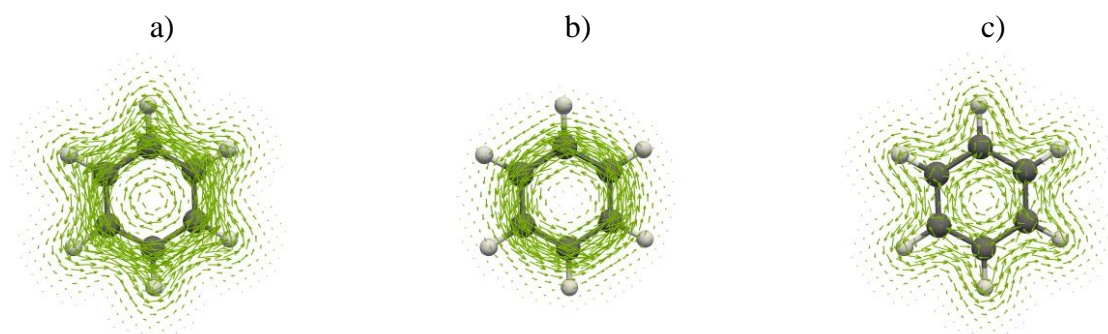

**Figure S4.** Maps of total current densities (a),  $\pi$  electron current densities (b) and  $\sigma$  electron current densities (c) of benzene calculated 1 bohr above the molecular plane. Other details same as in Figure 3.

**Table S1.** Bond current strengths (in nA T<sup>-1</sup>) for the symmetry-unique bonds in **3T**, **3S** and benzene.

| <b>3T</b> |       |          |       | <b>3S</b> |       |          |       | benzene |       |          |       |
|-----------|-------|----------|-------|-----------|-------|----------|-------|---------|-------|----------|-------|
| bond      | total | $\sigma$ | $\pi$ | bond      | total | $\sigma$ | $\pi$ | bond    | total | $\sigma$ | $\pi$ |
| B1-B2     | 8.2   | 3.2      | 4.5   | B1-B2     | 5.5   | 1.5      | 3.1   | C1-C2   | 4.47  | 4.52     | -0,05 |
|           |       |          |       | B2-B3     | 2.6   | -2.9     | 4.4   |         |       |          |       |
|           |       |          |       | B3-B4     | 3.3   | -2.2     | 4.4   |         |       |          |       |
|           |       |          |       | B4-B5     | 3.9   | -0.9     | 4.1   |         |       |          |       |

**Table S2.** Cartesian coordinates and energy (in au) for **1T**, **1S**, **2T**, **2S**, **3T** and **3S** at the B3LYP/def2-TZVP level of theory

|           |               |             |             |           |               |             |             |
|-----------|---------------|-------------|-------------|-----------|---------------|-------------|-------------|
| <b>1T</b> | -178.44668804 |             |             | <b>1S</b> | -178.43340350 |             |             |
| 0 3       |               |             |             | 0 1       |               |             |             |
| 5         | 0.00000000    | 1.56850000  | 0.00000000  | 5         | -0.82094500   | 1.24402500  | -0.00003700 |
| 5         | -1.35836100   | 0.78425000  | 0.00000000  | 5         | -1.71448701   | 0.00010600  | -0.00001200 |
| 5         | -1.35836100   | -0.78425000 | 0.00000000  | 5         | -0.82114100   | -1.24395400 | -0.00003400 |
| 5         | 0.00000000    | -1.56850000 | 0.00000000  | 5         | 0.82097100    | -1.24410700 | 0.00003300  |
| 5         | 1.35836100    | -0.78425000 | 0.00000000  | 5         | 1.71440000    | -0.00010700 | 0.00002900  |
| 5         | 1.35836100    | 0.78425000  | 0.00000000  | 5         | 0.82116600    | 1.24402900  | 0.00003500  |
| 4         | 0.00000000    | 0.00000000  | 1.10153701  | 4         | -0.00008000   | 0.00000600  | 1.13793200  |
| 4         | 0.00000000    | 0.00000000  | -1.10153701 | 4         | 0.00012400    | 0.00000500  | -1.13795000 |
| <b>2T</b> | -203.04051911 |             |             | <b>2S</b> | -203.02299698 |             |             |
| 1 3       |               |             |             | 1 1       |               |             |             |
| 5         | 0.00000000    | 1.77342901  | 0.00000000  | 5         | 2.30472300    | -0.00020300 | -0.00004600 |
| 5         | -0.76946200   | -1.59780400 | 0.00000000  | 5         | -1.72151001   | 0.76275400  | -0.00003200 |
| 5         | -1.72896500   | -0.39462500 | 0.00000000  | 5         | -0.37968400   | 1.51962800  | -0.00006200 |
| 5         | 1.72896500    | -0.39462500 | 0.00000000  | 5         | -0.38000400   | -1.51952800 | 0.00004200  |
| 5         | 1.38652301    | 1.10571500  | 0.00000000  | 5         | 1.12231201    | -0.97529300 | 0.00000500  |
| 5         | -1.38652301   | 1.10571500  | 0.00000000  | 5         | 1.12254100    | 0.97518300  | 0.00004200  |
| 5         | 0.76946200    | -1.59780400 | 0.00000000  | 5         | -1.72178300   | -0.76259300 | 0.00004300  |
| 4         | 0.00000000    | 0.00000000  | 1.07698300  | 4         | -0.21658600   | 0.00012900  | 1.15991600  |
| 4         | 0.00000000    | 0.00000000  | -1.07698300 | 4         | -0.21665600   | -0.00006400 | -1.15990800 |
| <b>3T</b> | -227.39350083 |             |             | <b>3S</b> | -227.38824824 |             |             |
| 2 3       |               |             |             | 2 1       |               |             |             |
| 5         | -1.85434700   | 0.76729700  | 0.00000000  | 5         | -0.41931300   | -1.98350500 | 0.00000000  |
| 5         | -1.85434700   | -0.76729700 | 0.00000000  | 5         | 1.10769500    | -1.85972800 | 0.00000000  |
| 5         | -0.76719900   | -1.85038100 | 0.00000000  | 5         | 1.94310400    | -0.57555500 | 0.00000000  |
| 5         | 0.76719900    | -1.85038100 | 0.00000000  | 5         | 1.45642500    | 0.88745500  | 0.00000000  |
| 5         | 1.85434700    | -0.76729700 | 0.00000000  | 5         | 0.08312000    | 1.65008500  | 0.00000000  |
| 5         | 1.85434700    | 0.76729700  | 0.00000000  | 5         | -1.34027100   | 2.24947900  | 0.00000000  |
| 5         | 0.76719900    | 1.85038100  | 0.00000000  | 5         | -1.49019100   | 0.71236600  | 0.00000000  |
| 5         | -0.76719900   | 1.85038100  | 0.00000000  | 5         | -1.47356000   | -0.85844100 | 0.00000000  |
| 4         | 0.00000000    | 0.00000000  | 1.09706600  | 4         | 0.08312000    | -0.13884700 | 1.13869200  |
| 4         | 0.00000000    | 0.00000000  | -1.09706600 | 4         | 0.08312000    | -0.13884700 | -1.13869200 |



**Table S3.** Cartesian coordinates and energy (in au) for low-lying isomeric structures of  $\text{Be}_2\text{B}_8^{2+}$  complex in singlet and triplet spin states at the B3LYP/def2-TZVP level of theory

|             |                |             |             |             |                |             |             |
|-------------|----------------|-------------|-------------|-------------|----------------|-------------|-------------|
| <b>3S-1</b> | -227.435447270 |             |             | <b>3T</b>   | -227.39350083  |             |             |
| 2 1         |                |             |             | 2 3         |                |             |             |
| 5           | 1.76396500     | -1.13757900 | -0.00018500 | 5           | -1.85434700    | 0.76729700  | 0.00000000  |
| 4           | -4.56520900    | -0.49263600 | -0.00036500 | 5           | -1.85434700    | -0.76729700 | 0.00000000  |
| 5           | 0.19743500     | -0.87003700 | 0.00015800  | 5           | -0.76719900    | -1.85038100 | 0.00000000  |
| 5           | -1.76396300    | 1.13757600  | -0.00002100 | 5           | 0.76719900     | -1.85038100 | 0.00000000  |
| 5           | 2.88215300     | -0.10329500 | 0.00000800  | 5           | 1.85434700     | -0.76729700 | 0.00000000  |
| 5           | -2.88214900    | 0.10329300  | -0.00013700 | 5           | 1.85434700     | 0.76729700  | 0.00000000  |
| 5           | -1.34816300    | -0.50210900 | 0.00032400  | 5           | 0.76719900     | 1.85038100  | 0.00000000  |
| 5           | -0.19743300    | 0.87005000  | 0.00018700  | 5           | -0.76719900    | 1.85038100  | 0.00000000  |
| 5           | 1.34815800     | 0.50208600  | 0.00001100  | 4           | 0.00000000     | 0.00000000  | 1.09706600  |
| 4           | 4.56520600     | 0.49265500  | -0.00006600 | 4           | 0.00000000     | 0.00000000  | -1.09706600 |
| <b>3S-2</b> | -227.420522569 |             |             | <b>3T-1</b> | -227.392141158 |             |             |
| 2 1         |                |             |             | 2 3         |                |             |             |
| 5           | 1.37822700     | -1.41242300 | -0.16742200 | 5           | 0.06002500     | -0.92076500 | 0.00000000  |
| 4           | -0.05046500    | -0.00064700 | 1.38160400  | 5           | 0.00000000     | 0.85871600  | 0.00000000  |
| 5           | 0.25864200     | 0.00011000  | -0.48420600 | 5           | 2.78741200     | 0.73227600  | 0.00000000  |
| 5           | -0.10906200    | 1.75176700  | 0.06423000  | 5           | 1.40851600     | 1.59468100  | 0.00000000  |
| 5           | 2.02912500     | -0.00012400 | -0.22567200 | 5           | -1.39456200    | 0.05019100  | 0.00000000  |
| 5           | -1.31548300    | 0.79954100  | 0.22031000  | 5           | 1.47480900     | -0.09476200 | 0.00000000  |
| 5           | -1.31588900    | -0.79935700 | 0.22006800  | 4           | -3.19953400    | -2.39362400 | 0.00000000  |
| 5           | 1.37848100     | 1.41230100  | -0.16741800 | 5           | -1.34123600    | -1.63383600 | 0.00000000  |
| 5           | -0.10941500    | -1.75154600 | 0.06385200  | 4           | 2.93976400     | 2.57251600  | 0.00000000  |
| 4           | -2.69281800    | 0.00031100  | -0.78628100 | 5           | -2.78714700    | -0.72961600 | 0.00000000  |
| <b>3S-3</b> | -227.414570775 |             |             | <b>3T-2</b> | -227.386768410 |             |             |
| 2 1         |                |             |             | 2 3         |                |             |             |
| 5           | -1.42359100    | 0.67782700  | -0.00005500 | 5           | 2.03334600     | 0.78495100  | -0.06891200 |
| 4           | 4.57339800     | 0.12935800  | 0.00041800  | 5           | -2.01781900    | -0.00163300 | 0.01361200  |
| 5           | -0.00001200    | 1.33114300  | -0.00011400 | 5           | 2.03423700     | -0.78329100 | -0.06912800 |
| 5           | 0.00000800     | -0.50785100 | -0.00008000 | 5           | -0.76243200    | -0.99885800 | -0.02857900 |
| 5           | -4.57338600    | 0.12937800  | 0.00010800  | 4           | 0.66769600     | 0.00000300  | 1.23344700  |
| 5           | -1.53642200    | -0.99904600 | -0.00014400 | 5           | 0.69892100     | -1.57908400 | -0.01281200 |
| 5           | -2.82395300    | -0.19394600 | 0.00006200  | 5           | 0.69720100     | 1.57934600  | -0.01281000 |
| 5           | 1.53643500     | -0.99903700 | -0.00021800 | 4           | -3.84476900    | 0.00118900  | -0.03033600 |
| 5           | 1.42357200     | 0.67783500  | -0.00000700 | 5           | 0.62165700     | 0.00020800  | -0.75538900 |
| 4           | 2.82395400     | -0.19391400 | 0.00013700  | 5           | -0.76345300    | 0.99740800  | -0.02847200 |

**3S-4**

-227.409819622

2 1

|   |             |             |             |
|---|-------------|-------------|-------------|
| 4 | -3.46898300 | -0.74047100 | -0.34567800 |
| 5 | 2.04565400  | 0.80608800  | -0.30453500 |
| 5 | -1.89407200 | -0.07875000 | 0.04053500  |
| 4 | -1.27579100 | 1.64146400  | -0.49509600 |
| 5 | 0.97387800  | -1.61633200 | -0.20398700 |
| 5 | 0.61525500  | 1.48439500  | -0.02031500 |
| 5 | -0.51952000 | -1.03562600 | 0.12815900  |
| 5 | 2.25037900  | -0.72904300 | -0.27985100 |
| 5 | -0.60743400 | 0.54067500  | 0.70190400  |
| 5 | 0.93168100  | -0.09220100 | 0.61071100  |

**3S-5**

-227.400269973

2 1

|   |             |             |             |
|---|-------------|-------------|-------------|
| 4 | -3.06398200 | -0.00076300 | -0.17221900 |
| 5 | 1.26844400  | -1.40296500 | -0.15852300 |
| 5 | -1.41608700 | 0.79497400  | 0.16472200  |
| 5 | 1.75262700  | 0.00021400  | -0.68418700 |
| 5 | -0.00334700 | 0.00021100  | -0.17497200 |
| 5 | -0.21655600 | -1.79991700 | 0.02815100  |
| 5 | -1.41582100 | -0.79451900 | 0.16523200  |
| 5 | 1.26838500  | 1.40299600  | -0.15788500 |
| 5 | -0.21664800 | 1.80023900  | 0.02827900  |
| 4 | 1.78773700  | -0.00077800 | 1.15869900  |

**3T-3**

-227.385523815

2 3

|   |             |             |             |
|---|-------------|-------------|-------------|
| 4 | 3.52671100  | 1.86716400  | 0.00001000  |
| 5 | -0.68585600 | -1.05633800 | -0.00005100 |
| 5 | 2.41156600  | 0.44786700  | -0.00047400 |
| 5 | -2.12090300 | -0.33430100 | -0.00000600 |
| 5 | 0.75215400  | 0.04060100  | 0.00019700  |
| 5 | 0.73607900  | -1.73964500 | -0.00004500 |
| 5 | 2.11183600  | -1.05866700 | 0.00022700  |
| 4 | -3.78992100 | 0.30930700  | -0.00033900 |
| 5 | -2.22062400 | 1.27312800  | 0.00016100  |
| 5 | -0.77368500 | 0.68617800  | 0.00025500  |

**3T-4**

-227.384869772

2 3

|   |             |             |             |
|---|-------------|-------------|-------------|
| 5 | 0.35109400  | -0.93821600 | -0.00033100 |
| 4 | -4.48048200 | -0.39101400 | 0.00068000  |
| 5 | -1.59375400 | 1.14066000  | -0.00015100 |
| 5 | -0.06497500 | 0.76468300  | -0.00047900 |
| 5 | -1.22986200 | -0.50943700 | -0.00026800 |
| 5 | 1.54272700  | 0.36902400  | -0.00018900 |
| 5 | -2.73588500 | 0.07088900  | 0.00043200  |
| 5 | 3.03481900  | -0.38549400 | 0.00024600  |
| 4 | 3.01927600  | 1.44560800  | 0.00008300  |
| 5 | 1.86480000  | -1.35578500 | 0.00013000  |

**Table S3.** Complete reference 73.

- 73 M. J. Frisch, G. W. Trucks, H. B. Schlegel, G. E. Scuseria, M. A. Robb, J. R. Cheeseman, G. Scalmani, V. Barone, B. Mennucci, G. A. Petersson, H. Nakatsuji, M. Caricato, X. Li, H. P. Hratchian, A. F. Izmaylov, J. Bloino, G. Zheng, J. L. Sonnenberg, M. Hada, M. Ehara, K. Toyota, R. Fukuda, J. Hasegawa, M. Ishida, T. Nakajima, Y. Honda, O. Kitao, H. Nakai, T. Vreven, J. A. Montgomery, J. E. Peralta, F. Ogliaro, M. Bearpark, J. J. Heyd, E. Brothers, K. N. Kudin, V. N. Staroverov, R. Kobayashi, J. Normand, K. Raghavachari, A. Rendell, J. C. Burant, S. S. Iyengar, J. Tomasi, M. Cossi, N. Rega, J. M. Millam, M. Klene, J. E. Knox, J. B. Cross, V. Bakken, C. Adamo, J. Jaramillo, R. Gomperts, R. E. Stratmann, O. Yazyev, A. J. Austin, R. Cammi, C. Pomelli, J. W. Ochterski, R. L. Martin, K. Morokuma, V. G. Zakrzewski, G. A. Voth, P. Salvador, J. J. Dannenberg, S. Dapprich, A. D. Daniels, Farkas, J. B. Foresman, J. V Ortiz, J. Cioslowski and D. J. Fox, Gaussian 09, Revision B.01, Gaussian Inc., Wallingford CT, 2009
